# Supplementary material for: Secondary organic aerosol formation from smoldering and flaming combustion of biomass: a box model parametrization based on volatility basis set
Source: Copernicus journal article supplement (doi:10.5194/acp-2018-1308), 2019-01-02
Supplement: Supplementary file 1 [file acp-2018-1308-supplement.pdf]

*Supplement of*

## **Secondary organic aerosol formation from smoldering and flaming combustion of biomass: a box model parametrization based on volatility basis set**

Giulia Stefenelli et al.

*Correspondence to:* Imad El Haddad ([imad.el-haddad@psi.ch](mailto:imad.el-haddad@psi.ch)), Jay Slowik ([jay.slowik@psi.ch](mailto:jay.slowik@psi.ch)) and Jianhui Jiang ([Jianhui.jiang@psi.ch](mailto:Jianhui.jiang@psi.ch))

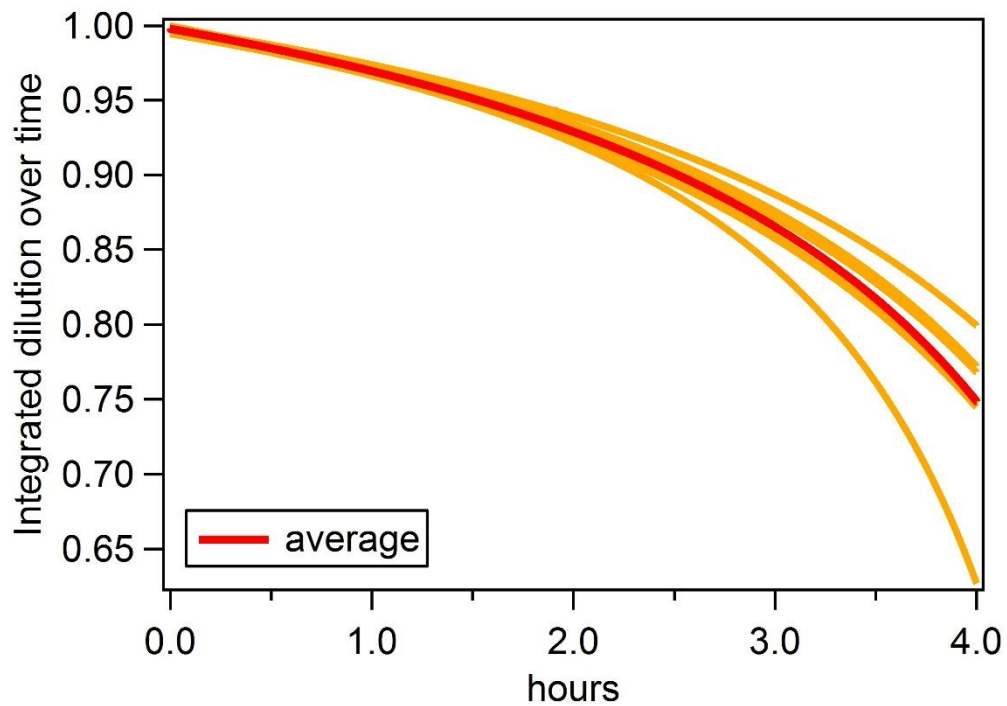

Figure S1. Integrated dilution over time calculated for each experiment in Set1 and average dilution ratio across all (Set1) experiments. The average OH exposure at the end of the experiment is  $6.3 \times 10^6$  molec  $\text{cm}^{-3}$  h.

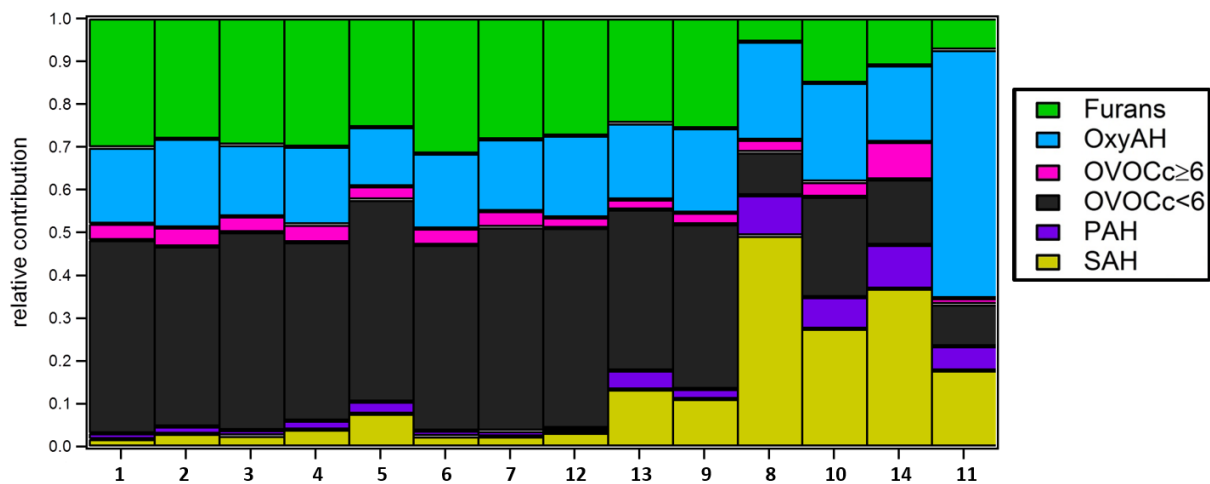

**Figure S2.** Relative contributions of different primary VOCs families (measured in  $\mu\text{g m}^{-3}$ ) for each experiment. The experiments from Set2 (8-14) are ordered based on similarity with Set1 (1-7).

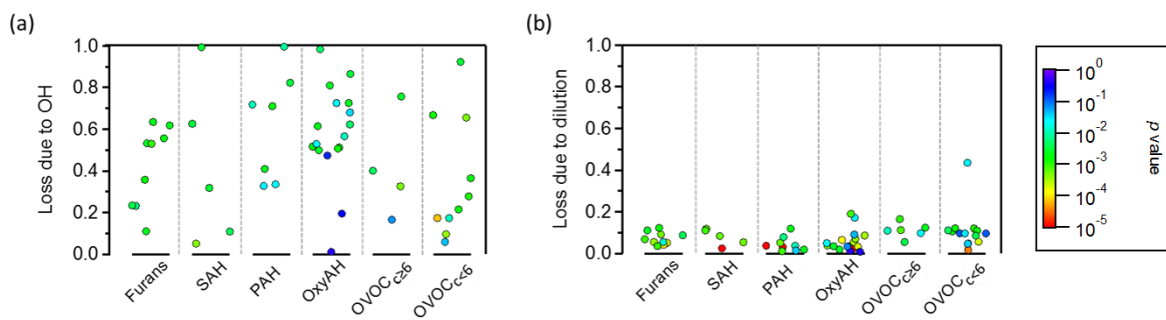

**Figure S3.** Fraction of consumed precursor compounds for Set2 by OH oxidation (a) and dilution (b) at the end of the experiments. Each point corresponds to a single compound averaged among experiments, accounting for its standard deviation, normalized for initial concentration. The color legend represents the statistical significant deviation from zero reactivity with the investigated reactant ( $p$  value).

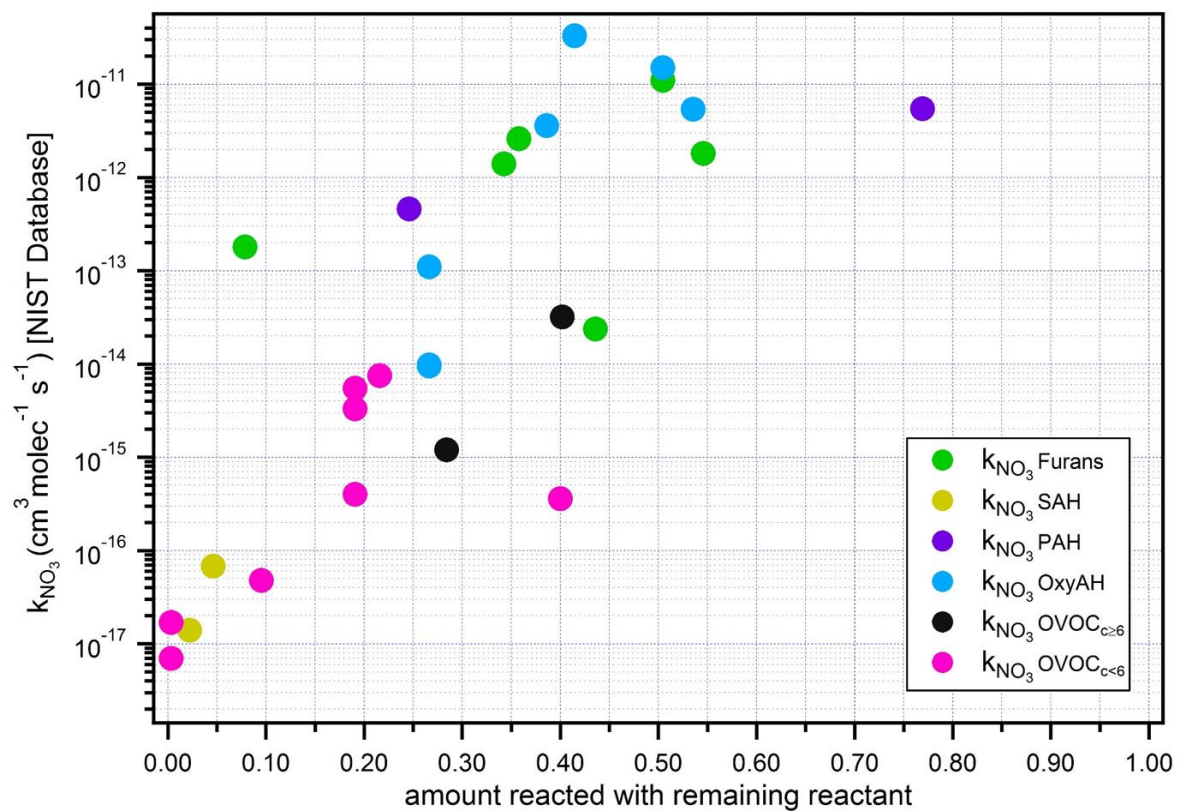

Figure S4. Reaction rates towards  $\text{NO}_3$  from NIST database (NIST Chemistry WebBook, 2018) versus amount reacted with the remaining oxidant for different compounds. All data is from Set1 experiments.

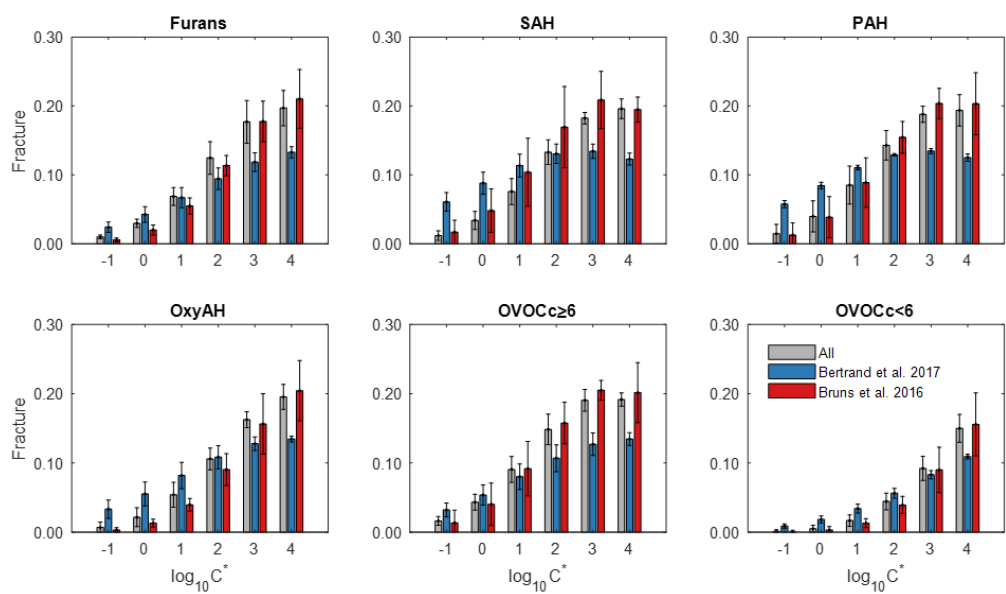

**Figure S5. Volatility distributions of different precursor classes for Bertrand et al. (2017) (Set1) and Bruns et al. (2016) (Set2), and both of them (labelled "all"). The error bars represent the standard error of 30 bootstrap runs.**

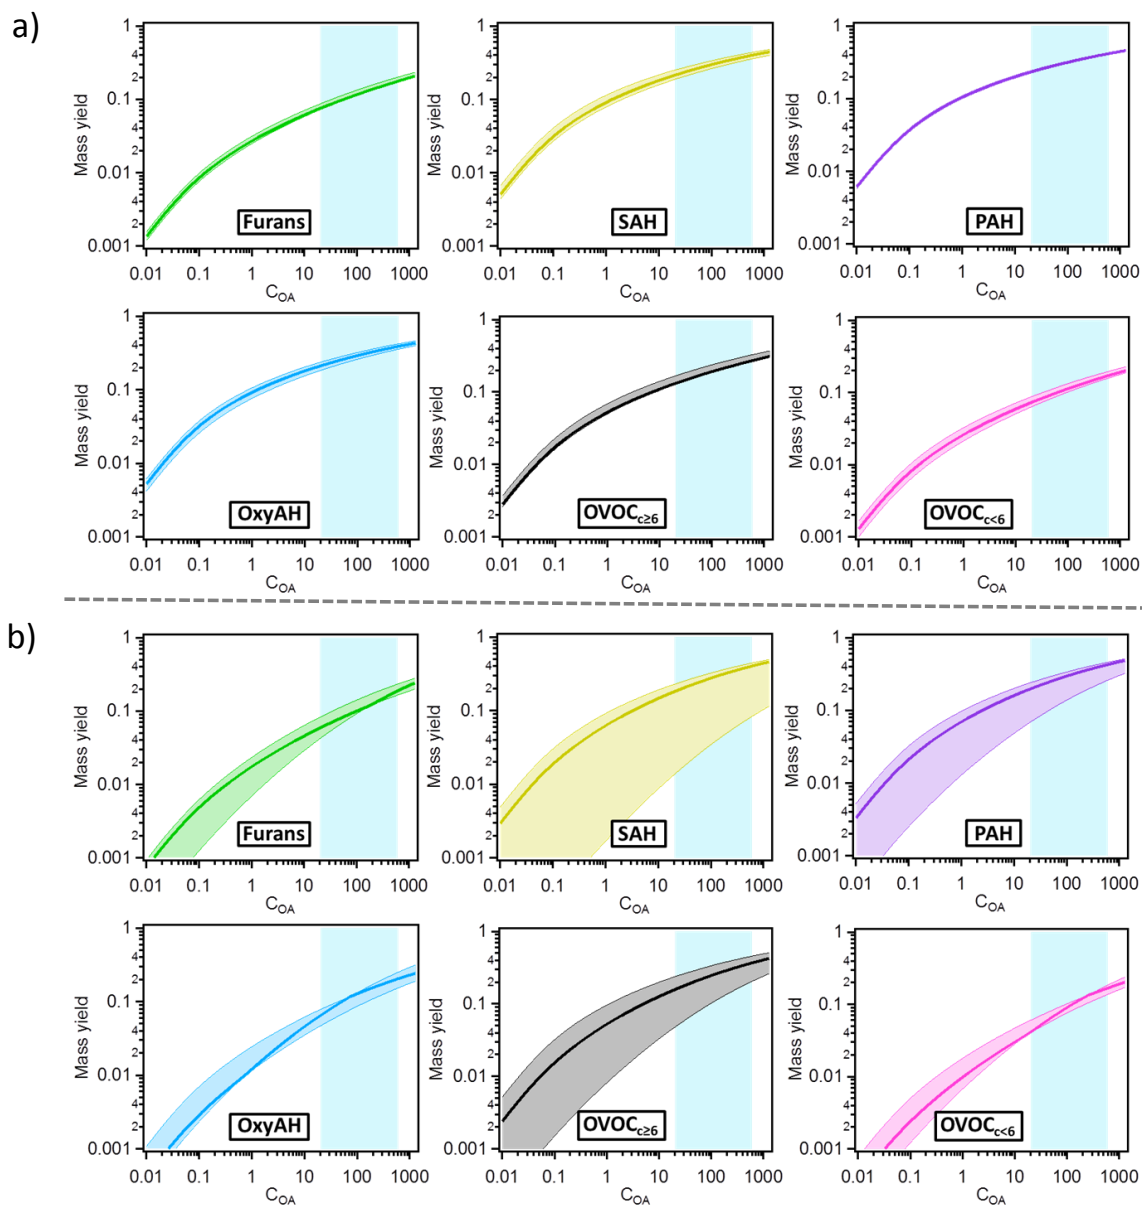

**Figure S6.** Mass yields for each class of compounds for Set1 (a) and Set2 (b). The solid lines represent the median values while the lower and upper limits are the 25<sup>th</sup> and 75<sup>th</sup> percentiles, respectively. The shaded background represent the experimental range (20-600  $\mu\text{g m}^{-3}$ ), outside this shaded area yields are extrapolated from the model.

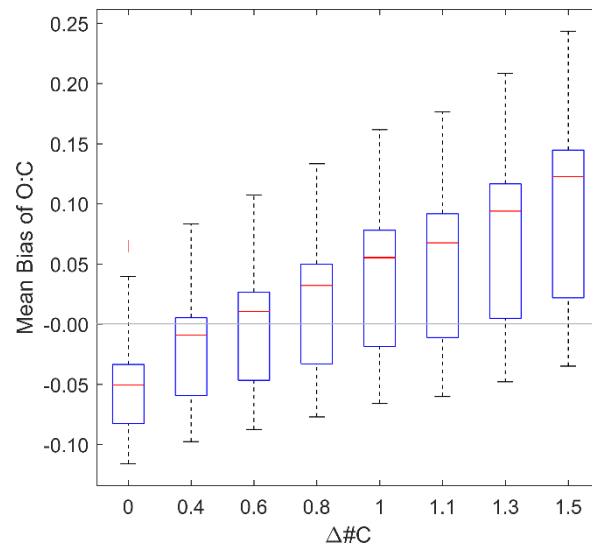

**Figure S7. Mean bias of O:C ratio versus assumed  $\Delta C$ .**



**Table S1. VOCs accounted as SOA precursor grouped in different chemical classes. Reported reaction rate constants ( $\text{cm}^3 \text{ molec}^{-1} \text{ s}^{-1}$ ) towards OH calculated from Set2 and towards  $\text{NO}_3$  from NIST Database. Missing data are not available. Where there is ambiguity regarding the compound identity, the compound listed first is the one for which the  $\text{NO}_3$  rate constant is reported. The  $m/z$  column denotes the  $m/z$  at which the species is actually observed in the PTR-TOF-MS (i.e., protonated mass) and the formula denotes the parent compound.**

|               | <b>m/z</b> | <b>Formula</b>                                | <b>Identified compound</b>                                      | <b><math>k_{\text{OH}}</math></b> | <b><math>k_{\text{NO}_3}</math></b>                                                                 |
|---------------|------------|-----------------------------------------------|-----------------------------------------------------------------|-----------------------------------|-----------------------------------------------------------------------------------------------------|
| <b>Furans</b> | 69.03      | C <sub>4</sub> H <sub>4</sub> O               | Furan                                                           | $1.35 \times 10^{-11}$            | $1.4 \times 10^{-12}$                                                                               |
|               | 83.05      | C <sub>5</sub> H <sub>6</sub> O               | 2-Methylfuran                                                   | $1.90 \times 10^{-11}$            | $1.1 \times 10^{-11}$                                                                               |
|               | 85.03      | C <sub>4</sub> H <sub>4</sub> O <sub>2</sub>  | 2-Furanone                                                      | $4.91 \times 10^{-12}$            | $1.8 \times 10^{-13}$                                                                               |
|               | 97.03      | C <sub>5</sub> H <sub>4</sub> O <sub>2</sub>  | Furan-2-carbaldehyde (furfural)                                 | $1.25 \times 10^{-11}$            | $2.6 \times 10^{-12}$                                                                               |
|               | 97.06      | C <sub>6</sub> H <sub>8</sub> O               | 2,3/2,4-/2,5-dimethylfuran                                      | $2.64 \times 10^{-11}$            | $5.8 \times 10^{-11}/$<br>$5.7 \times 10^{-11}/$<br>$5.8 \times 10^{-11}$                           |
|               | 99.04      | C <sub>5</sub> H <sub>6</sub> O <sub>2</sub>  | 2-methyl-2-butenedial/ Furfuryl alcohol                         | $9.87 \times 10^{-12}$            |                                                                                                     |
|               | 99.08      | C <sub>6</sub> H <sub>10</sub> O              | Dimethyldihydrofurane (Cyclohexanone)                           | $9.53 \times 10^{-13}$            |                                                                                                     |
|               | 111.08     | C <sub>7</sub> H <sub>10</sub> O              | Trimethylfuran                                                  | $2.47 \times 10^{-11}$            |                                                                                                     |
|               | 115.04     | C <sub>5</sub> H <sub>6</sub> O <sub>3</sub>  | 4-Methoxy-2(5H)-furanone                                        | $6.89 \times 10^{-13}$            |                                                                                                     |
|               | 117.03     | C <sub>8</sub> H <sub>4</sub> O               | 2,5-Diethynylfuran                                              |                                   |                                                                                                     |
|               | 119.05     | C <sub>8</sub> H <sub>6</sub> O               | Benzofuran                                                      |                                   |                                                                                                     |
|               | 127.04     | C <sub>6</sub> H <sub>6</sub> O <sub>3</sub>  | 5-(hydroxymethyl)furan-2-carbaldehyde/<br>Hydroxymethylfurfural | $3.19 \times 10^{-13}$            |                                                                                                     |
|               | 141.05     | C <sub>7</sub> H <sub>8</sub> O <sub>3</sub>  | 5-(Methoxymethyl)-2-furaldehyde                                 |                                   |                                                                                                     |
|               | 143.07     | C <sub>7</sub> H <sub>10</sub> O <sub>3</sub> | 2-Methyl-4,5-dihydro-furan-3-carboxylic acid methyl ester       |                                   |                                                                                                     |
| <b>SAH</b>    | 78.05      | C <sub>6</sub> H <sub>5</sub>                 | Benzene fragment                                                | $4.45 \times 10^{-13}$            |                                                                                                     |
|               | 79.05      | C <sub>6</sub> H <sub>6</sub>                 | Benzene                                                         | $1.37 \times 10^{-12}$            | $1.4 \times 10^{-17}$                                                                               |
|               | 93.07      | C <sub>7</sub> H <sub>8</sub>                 | Toluene                                                         | $4.85 \times 10^{-12}$            | $6.8 \times 10^{-17}$                                                                               |
|               | 103.05     | C <sub>8</sub> H <sub>6</sub>                 | Phenylacetylene                                                 | $2.33 \times 10^{-11}$            |                                                                                                     |
|               | 105.07     | C <sub>8</sub> H <sub>8</sub>                 | Styrene                                                         | $4.12 \times 10^{-11}$            |                                                                                                     |
|               | 107.09     | C <sub>8</sub> H <sub>10</sub>                | Ethylbenzene/1,2-/1,3-/1,4-Xylene                               | $1.25 \times 10^{-11}$            | $5.7 \times 10^{-16}/$<br>$2.0 \times 10^{-16}/$<br>$7.1 \times 10^{-17}/$<br>$1.5 \times 10^{-16}$ |
| <b>PAH</b>    | 117.07     | C <sub>9</sub> H <sub>8</sub>                 | 1-indene                                                        | $5.60 \times 10^{-11}$            |                                                                                                     |
|               | 119.09     | C <sub>9</sub> H <sub>10</sub>                | 2-Phenylpropene/2,3-dihydro-1H-indene                           | $6.59 \times 10^{-11}$            | $6.8 \times 10^{-12}/$<br>$6.0 \times 10^{-15}$                                                     |
|               | 129.07     | C <sub>10</sub> H <sub>8</sub>                | Naphtalene                                                      | $2.14 \times 10^{-11}$            |                                                                                                     |
|               | 131.09     | C <sub>10</sub> H <sub>10</sub>               | Dihydronaphtalene                                               |                                   |                                                                                                     |
|               | 143.09     | C <sub>11</sub> H <sub>10</sub>               | Methylnaphtalene                                                | $3.81 \times 10^{-11}$            |                                                                                                     |
|               | 153.07     | C <sub>12</sub> H <sub>8</sub>                | Acenaphtylene                                                   | $9.97 \times 10^{-11}$            | $5.4 \times 10^{-12}$                                                                               |
|               | 155.09     | C <sub>12</sub> H <sub>10</sub>               | 1,2-dihydro-Acenaphtylene                                       | $1.09 \times 10^{-11}$            | $4.6 \times 10^{-13}$                                                                               |
|               | 157.10     | C <sub>12</sub> H <sub>12</sub>               | Dimethylnaphtalene                                              | $1.94 \times 10^{-11}$            |                                                                                                     |
|               | 167.09     | C <sub>13</sub> H <sub>10</sub>               | Fluorene                                                        | $5.58 \times 10^{-11}$            | $3.5 \times 10^{-14}$                                                                               |

|                |        |          |                                                                                             |                         |                                                                                                        |
|----------------|--------|----------|---------------------------------------------------------------------------------------------|-------------------------|--------------------------------------------------------------------------------------------------------|
|                | 179.09 | C14H10   | Phenanthrene                                                                                | 5.45×10 <sup>-12</sup>  |                                                                                                        |
|                | 193.10 | C15H12   | 2-methylanthracene                                                                          | 2.70×10 <sup>-10</sup>  |                                                                                                        |
|                | 203.09 | C16H10   | Fluoranthrene                                                                               | 2.99×10 <sup>-12</sup>  |                                                                                                        |
| <b>OxyAH</b>   | 95.05  | C6H6O    | Phenol                                                                                      | 2.51×10 <sup>-11</sup>  | 3.6×10 <sup>-12</sup>                                                                                  |
|                | 107.05 | C7H6O    | Benzaldehyde                                                                                |                         | 2.0×10 <sup>-15</sup>                                                                                  |
|                | 109.07 | C7H8O    | Cresol (Methylphenol)                                                                       | 4.28×10 <sup>-11</sup>  | 1.5×10 <sup>-11</sup>                                                                                  |
|                | 111.04 | C6H6O2   | Benzenediol (Catechol)/ methylfurfural                                                      | 1.23×10 <sup>-11</sup>  | 9.8×10 <sup>-11</sup> /<br>5.4×10 <sup>-12</sup>                                                       |
|                | 121.07 | C8H8O    | 2/3/4-methylbenzaldehyde/ Benzofuran, 2,3-dihydro                                           |                         | 9.8×10 <sup>-15</sup> /<br>9.5×10 <sup>-15</sup> /<br>9.5×10 <sup>-15</sup> /<br>1.1×10 <sup>-13</sup> |
|                | 123.04 | C7H6O2   | Hydroxy benzaldehyde                                                                        |                         |                                                                                                        |
|                | 123.08 | C8H10O   | Xylenol (2,5-dimethyl phenol)                                                               | 7.41×10 <sup>-11</sup>  | 3.3×10 <sup>-11</sup>                                                                                  |
|                | 125.06 | C7H8O2   | Methylbenzenediols/ Guaiacol (2-methoxyphenol)                                              | 2.15×10 <sup>-11</sup>  | 1.5×10 <sup>-10</sup>                                                                                  |
|                | 131.05 | C9H6O    | Indenone                                                                                    |                         |                                                                                                        |
|                | 133.07 | C9H8O    | Methylbenzofuran /Indanone                                                                  |                         |                                                                                                        |
|                | 137.06 | C8H8O2   |                                                                                             |                         |                                                                                                        |
|                | 137.10 | C9H12O   | 2,4,6-Trimethyl phenol                                                                      |                         |                                                                                                        |
|                | 139.04 | C7H6O3   | Salicylic acid                                                                              |                         |                                                                                                        |
|                | 139.08 | C8H10O2  | 1,2-/1,3-/1,4-Dimethoxybenzene                                                              | 2.44×10 <sup>-11</sup>  |                                                                                                        |
|                | 147.04 | C9H6O2   | 2-3-dihydroinden-1-one                                                                      | 9.10×10 <sup>-12</sup>  |                                                                                                        |
|                | 151.08 | C9H10O2  | 4-Vinylguaiacol                                                                             | 6.72×10 <sup>-12</sup>  |                                                                                                        |
|                | 153.06 | C8H8O3   | 4-hydroxy-3-methoxybenzaldehyde                                                             | 4.20×10 <sup>-11</sup>  |                                                                                                        |
|                | 153.09 | C9H12O2  | 4-ethyl-2-methoxyphenol/1,2-dimethoxy-4-methylbenzene                                       |                         |                                                                                                        |
|                | 155.07 | C8H10O3  | Syringol/2,6-Dimethoxyphenol                                                                | 2.07×10 <sup>-11</sup>  |                                                                                                        |
|                | 165.09 | C10H12O2 | 2-methoxy-4-prop-1-enylphenol                                                               | 2.92×10 <sup>-11</sup>  |                                                                                                        |
|                | 167.07 | C9H10O3  | 1-(4-hydroxy-3-methoxyphenyl)ethanone/2,5-dimethylbenzaldehyde/3,4-dimethoxybenzaldehyde    | 6.70×10 <sup>-12</sup>  |                                                                                                        |
|                | 167.11 | C10H14O2 | 2-methoxyphenol-4-propylphenol                                                              | 2.46×10 <sup>-11</sup>  |                                                                                                        |
|                | 169.09 | C9H12O3  | 2-6-dimethoxy-4-methylphenol                                                                | 3.47×10 <sup>-10</sup>  |                                                                                                        |
|                | 183.07 | C9H10O4  | 3-4-dimethoxybenzoic acid /4-hydroxy-3,5-dimethoxybenzaldehyde/ 4-ethyl-2,6-dimethoxyphenol | 7.74×10 <sup>-12</sup>  |                                                                                                        |
|                | 183.10 | C10H14O3 | 4-ethyl-2,6-dimethoxyphenol                                                                 | 2.07×10 <sup>-11</sup>  |                                                                                                        |
|                | 195.10 | C11H14O3 | 1-3-dimethoxy-2-prop-2-enoxybenzene                                                         | 3.81×10 <sup>-12</sup>  |                                                                                                        |
|                | 145.07 | C10H8O   | Naphtol                                                                                     | 6.08×10 <sup>-11</sup>  |                                                                                                        |
|                | 181.07 | C13H8O   | Fluoren-9-one                                                                               | -1.17×10 <sup>-12</sup> |                                                                                                        |
| <b>OVOCc≥6</b> | 94.04  | C6H5O    |                                                                                             | 4.84×10 <sup>-11</sup>  |                                                                                                        |
|                | 108.06 | C7H7O    | Phenoxyethyl                                                                                | 3.57×10 <sup>-11</sup>  |                                                                                                        |
|                | 109.03 | C6H4O2   | Benzoquinone                                                                                | 2.86×10 <sup>-12</sup>  |                                                                                                        |
|                | 110.04 | C6H5O2   | 2-Hydroxyphenolate                                                                          | 1.66×10 <sup>-11</sup>  |                                                                                                        |

|                   |        |         |                                                                                                          |                         |                                                                                                     |
|-------------------|--------|---------|----------------------------------------------------------------------------------------------------------|-------------------------|-----------------------------------------------------------------------------------------------------|
|                   | 113.10 | C7H12O  | Cyclohexane-1-carboxaldehyde                                                                             | $-3.62 \times 10^{-13}$ | $3.2 \times 10^{-14}$                                                                               |
|                   | 115.08 | C6H10O2 |                                                                                                          | $6.59 \times 10^{-10}$  |                                                                                                     |
|                   | 117.09 | C6H12O2 | Hexanoic acid                                                                                            | $2.06 \times 10^{-12}$  | $1.2 \times 10^{-15}$                                                                               |
|                   | 127.08 | C7H10O2 |                                                                                                          | $1.73 \times 10^{-11}$  |                                                                                                     |
|                   | 141.09 | C8H12O2 |                                                                                                          |                         |                                                                                                     |
|                   | 145.04 | C6H8O4  | Dimethyl fumarate                                                                                        |                         |                                                                                                     |
|                   | 147.08 | C10H10O |                                                                                                          |                         |                                                                                                     |
| <b>OVOCC&lt;6</b> | 57.03  | C3H4O   | Acrolein                                                                                                 | $7.96 \times 10^{-13}$  | $1.1 \times 10^{-15}$                                                                               |
|                   | 71.05  | C4H6O   | Methyl vinyl ketone/Methacrolein/Crotonaldehyde                                                          | $1.51 \times 10^{-11}$  | $4.0 \times 10^{-16}/$<br>$5.5 \times 10^{-15}/$<br>$3.3 \times 10^{-15}$                           |
|                   | 75.04  | C3H6O2  | Methyl acetate/Propionic acid                                                                            | $4.41 \times 10^{-13}$  | $7.0 \times 10^{-18}/$<br>$1.7 \times 10^{-17}$                                                     |
|                   | 81.03  | C5H4O   | Cyclopentadienone                                                                                        | $6.83 \times 10^{-11}$  |                                                                                                     |
|                   | 85.06  | C5H8O   | 3-methyl-3-buten-2-one                                                                                   | $1.35 \times 10^{-11}$  |                                                                                                     |
|                   | 87.04  | C4H6O2  | Vinyl acetate                                                                                            | $2.46 \times 10^{-12}$  | $7.5 \times 10^{-15}$                                                                               |
|                   | 87.08  | C5H10O  | Pentanal                                                                                                 | $-2.67 \times 10^{-13}$ | $2.6 \times 10^{-14}$                                                                               |
|                   | 89.06  | C4H8O2  | ethyl acetate                                                                                            | $1.20 \times 10^{-12}$  |                                                                                                     |
|                   | 95.01  | C5H2O2  |                                                                                                          |                         |                                                                                                     |
|                   | 96.02  | C5H3O2  |                                                                                                          |                         |                                                                                                     |
|                   | 101.06 | C5H8O2  | 2-Butenoic acid, methyl ester, (E)-/ 2-Propenoic acid, ethyl ester / Methyl methacrylate                 | $1.61 \times 10^{-12}$  | $1.8 \times 10^{-15}/$<br>$1.7 \times 10^{-16}/$<br>$3.6 \times 10^{-16}$                           |
|                   | 103.04 | C4H6O3  |                                                                                                          |                         |                                                                                                     |
|                   | 103.04 | C4H6O3  |                                                                                                          | $8.51 \times 10^{-12}$  |                                                                                                     |
|                   | 103.08 | C5H10O2 | Butanoic acid, methyl ester/ 3-Hydroxy-3-methyl-2-butanone/n-Propyl acetate/ Propanoic acid, ethyl ester | $1.27 \times 10^{-12}$  | $4.8 \times 10^{-17}/$<br>$2.0 \times 10^{-16}/$<br>$5.0 \times 10^{-17}/$<br>$3.3 \times 10^{-17}$ |
|                   | 117.06 | C5H8O3  | Levulinic acid                                                                                           | $4.53 \times 10^{-12}$  |                                                                                                     |

**Table S2. Experimental conditions of published SOA yields for different compounds. Reported the type of reactor deployed and the experimental temperatures investigated (Odum et al., 1996; Takekawa et al., 2003; Johnson et al., 2005; Song et al., 2005; Ng et al., 2007; Henry et al., 2008; Chan et al., 2009; Gómez Alvarez et al., 2009; Shakya and Griffin, 2010; Chan et al., 2010; Nakao et al., 2011; Borrás and Tortajada-Genaro, 2012; Yee et al., 2013; Chen et al., 2016; Li et al., 2016; Ahlberg et al., 2017). Missing data are not specified in the related paper.**

| reference                     | compound                 | reactor/chamber | temperature |
|-------------------------------|--------------------------|-----------------|-------------|
| <b>Ahlberg et al. (2017)</b>  | m-xylene                 | flow reactor    |             |
| <b>Song et al. (2005)</b>     | m-xylene                 | smog chamber    | 27°C        |
| <b>Nakao et al. (2011)</b>    | m-xylene                 | smog chamber    | 27°C        |
|                               | toluene                  | smog chamber    | 27°C        |
|                               | benzene                  | smog chamber    | 27°C        |
|                               | o-cresol                 | smog chamber    | 27°C        |
|                               | m-cresol                 | smog chamber    | 27°C        |
| <b>Ng et al. (2007)</b>       | phenol                   | smog chamber    | 27°C        |
|                               | m-xylene                 | smog chamber    | 25°C        |
| <b>Li et al. (2016a)</b>      | toluene                  | smog chamber    | 25°C        |
|                               | m-xylene                 | smog chamber    | 27°C        |
| <b>Li et al. (2016a)</b>      | toluene                  | smog chamber    | 27°C        |
|                               | benzene                  | smog chamber    | 27°C        |
|                               | 1,2,4-trimethylbenzene   | smog chamber    | 27°C        |
|                               | 1,2,4,5-trimethylbenzene | smog chamber    | 27°C        |
|                               | 1,2,4-trimethylbenzene   | smog chamber    | 27°C        |
| <b>Odum et al. (1996)</b>     | m-xylene                 | outdoor chamber |             |
|                               | 1,2,4-trimethylbenzene   | outdoor chamber |             |
| <b>Takekawa et al. (2003)</b> | m-xylene                 | smog chamber    | 9°C, 30°C   |
|                               | toluene                  | smog chamber    | 9°C, 30°C   |
|                               | 1,2,4-trimethylbenzene   | smog chamber    | 9°C, 30°C   |
| <b>Borras et al. (2012)</b>   | benzene                  | photoreactor    |             |
|                               | phenol                   | photoreactor    |             |
|                               | catechol                 | photoreactor    |             |
| <b>Johnson et al. (2005)</b>  | benzene                  | outdoor chamber | 23°C-32°C   |
|                               | 1,3,5-trimethylbenzene   | outdoor chamber | 19°C-31°C   |
| <b>Henry et al. (2008)</b>    | m-cresol                 | smog chamber    | 20°C-21°C   |
|                               | p-cresol                 | smog chamber    | 20°C-21°C   |
|                               | o-cresol                 | smog chamber    | 20°C-21°C   |
| <b>Yee et al. (2013)</b>      | phenol                   | smog chamber    | 20°C-26°C   |
|                               | guaiacol                 | smog chamber    | 20°C-26°C   |
|                               | syringol                 | smog chamber    | 20°C-26°C   |
| <b>Chan et al. (2009)</b>     | naphtalene               | smog chamber    | 26°C        |
|                               | 1-methylnaphtalene       | smog chamber    | 26°C        |
|                               | 2-methylnaphtalene       | smog chamber    | 26°C        |
| <b>Chen et al. (2016)</b>     | naphtalene               | smog chamber    |             |
|                               | 1-methylnaphtalene       | smog chamber    |             |
|                               | 2-methylnaphtalene       | smog chamber    |             |
| <b>Shakya et al. (2010)</b>   | naphtalene               | smog chamber    | 21°C-24°C   |

|                                    |                        |              |           |
|------------------------------------|------------------------|--------------|-----------|
|                                    | methylnaphtalene       | smog chamber | 21°C-24°C |
|                                    | acenaphtylene          | smog chamber | 21°C-24°C |
|                                    | biphenyl               | smog chamber | 21°C-24°C |
| <b>Chan et al. (2010)</b>          | methacrolein           | smog chamber | 20°C-21°C |
|                                    | crotonaldehyde         | smog chamber | 20°C-21°C |
|                                    | acrolein               | smog chamber | 20°C-21°C |
|                                    | pentanal               | smog chamber | 20°C-21°C |
| <b>Gomez Alvarez et al. (2009)</b> | furan                  | smog chamber | 25°C      |
|                                    | methylfuran            | smog chamber | 25°C      |
| <b>Li et al. (2016b)</b>           | 1,2,3-trimethylbenzene | smog chamber | 27°C      |
|                                    | 1,2,5-trimethylbenzene | smog chamber | 27°C      |

**Table S3. OH reaction rate constants ( $k_{OH}$ ) ( $\text{cm}^3 \text{molec}^{-1} \text{s}^{-1}$ ) determined for each precursors class from Set2.**

| <b>Expt.</b>    | <b>Furans</b>          | <b>SAH</b>             | <b>PAH</b>             | <b>OxyAH</b>           | <b>OVOC<sub>c≥6</sub></b> | <b>OVOC<sub>c&lt;6</sub></b> |
|-----------------|------------------------|------------------------|------------------------|------------------------|---------------------------|------------------------------|
| <b>1 (-10C)</b> | $1.34 \times 10^{-11}$ | $3.22 \times 10^{-12}$ | $2.43 \times 10^{-11}$ | $1.99 \times 10^{-11}$ | $1.16 \times 10^{-11}$    | $7.41 \times 10^{-12}$       |
| <b>2 (-10C)</b> | $2.19 \times 10^{-11}$ | $5.63 \times 10^{-12}$ | $5.74 \times 10^{-11}$ | $3.85 \times 10^{-11}$ | $3.38 \times 10^{-11}$    | $2.90 \times 10^{-11}$       |
| <b>3 (+15C)</b> | $8.41 \times 10^{-12}$ | $3.79 \times 10^{-12}$ | $3.48 \times 10^{-11}$ | $2.37 \times 10^{-11}$ | $9.24 \times 10^{-12}$    | $5.48 \times 10^{-12}$       |
| <b>4 (+15C)</b> | $8.91 \times 10^{-12}$ | $4.31 \times 10^{-12}$ | $3.33 \times 10^{-11}$ | $1.87 \times 10^{-11}$ | $1.16 \times 10^{-11}$    | $5.97 \times 10^{-12}$       |
| <b>5 (+15C)</b> | $1.36 \times 10^{-11}$ | $3.70 \times 10^{-12}$ | $1.92 \times 10^{-11}$ | $3.09 \times 10^{-11}$ | $1.19 \times 10^{-11}$    | $7.71 \times 10^{-12}$       |
| <b>6 (+15C)</b> | $1.22 \times 10^{-11}$ | $3.17 \times 10^{-12}$ | $2.96 \times 10^{-11}$ | $2.73 \times 10^{-11}$ | $1.00 \times 10^{-11}$    | $7.75 \times 10^{-12}$       |
| <b>7 (+15C)</b> | $8.52 \times 10^{-12}$ | $3.32 \times 10^{-12}$ | $3.10 \times 10^{-11}$ | $2.09 \times 10^{-11}$ | $8.94 \times 10^{-12}$    | $7.78 \times 10^{-12}$       |

**Table S4. Molecular properties of VBS species assuming  $\Delta C = 0.6$  due to fragmentation. #C and #H are calculated as averaged values of all chemical species for each precursor category. #O of each precursor class and volatility bins are calculated by the SIMPOL approach (Pankow and Asher, 2008), provided by Eq. (3) in Donahue et al. (2011).**

| <b>OA Species</b> | <b>logC*</b> | <b>#C</b> | <b>#O</b> | <b>#H</b> | <b>O:C</b> | <b>Molecular Weight</b> |
|-------------------|--------------|-----------|-----------|-----------|------------|-------------------------|
| <b>POA</b>        | -1           | 11.00     | 4.11      | 18.24     | 0.374      | 216                     |
|                   | 0            | 11.75     | 3.43      | 20.12     | 0.292      | 216                     |
|                   | 1            | 12.50     | 2.73      | 22.32     | 0.218      | 216                     |
|                   | 2            | 13.25     | 2.01      | 24.84     | 0.152      | 216                     |
|                   | 3            | 14.00     | 1.27      | 26.68     | 0.091      | 215                     |
|                   | 4            | 14.75     | 0.51      | 29.84     | 0.035      | 215                     |
| <b>Furans</b>     | -1           | 5.53      | 5.15      | 6.13      | 0.932      | 155                     |
|                   | 0            | 5.53      | 4.68      | 6.13      | 0.847      | 147                     |
|                   | 1            | 5.53      | 4.21      | 6.13      | 0.761      | 140                     |
|                   | 2            | 5.53      | 3.73      | 6.13      | 0.675      | 132                     |
|                   | 3            | 5.53      | 3.25      | 6.13      | 0.588      | 124                     |
|                   | 4            | 5.53      | 2.76      | 6.13      | 0.500      | 117                     |
| <b>SAH</b>        | -1           | 6.77      | 4.95      | 6.77      | 0.731      | 167                     |
|                   | 0            | 6.77      | 4.47      | 6.77      | 0.660      | 159                     |
|                   | 1            | 6.77      | 3.99      | 6.77      | 0.589      | 152                     |
|                   | 2            | 6.77      | 3.50      | 6.77      | 0.517      | 144                     |
|                   | 3            | 6.77      | 3.00      | 6.77      | 0.444      | 136                     |
|                   | 4            | 6.77      | 2.50      | 6.77      | 0.370      | 128                     |
| <b>PAH</b>        | -1           | 11.52     | 3.99      | 9.50      | 0.347      | 212                     |
|                   | 0            | 11.52     | 3.48      | 9.50      | 0.302      | 203                     |
|                   | 1            | 11.52     | 2.96      | 9.50      | 0.257      | 195                     |
|                   | 2            | 11.52     | 2.44      | 9.50      | 0.212      | 187                     |
|                   | 3            | 11.52     | 1.91      | 9.50      | 0.166      | 178                     |
|                   | 4            | 11.52     | 1.36      | 9.50      | 0.118      | 170                     |
| <b>OxyAH</b>      | -1           | 8.17      | 4.69      | 8.72      | 0.574      | 182                     |
|                   | 0            | 8.17      | 4.20      | 8.72      | 0.514      | 174                     |
|                   | 1            | 8.17      | 3.71      | 8.72      | 0.454      | 166                     |
|                   | 2            | 8.17      | 3.21      | 8.72      | 0.392      | 158                     |
|                   | 3            | 8.17      | 2.70      | 8.72      | 0.330      | 150                     |



|                              |    |      |      |      |       |     |
|------------------------------|----|------|------|------|-------|-----|
|                              | 4  | 8.17 | 2.19 | 8.72 | 0.268 | 142 |
| <b>OCOC<sub>C≥6</sub></b>    | -1 | 6.42 | 5.01 | 8.13 | 0.780 | 165 |
|                              | 0  | 6.42 | 4.53 | 8.13 | 0.706 | 158 |
|                              | 1  | 6.42 | 4.05 | 8.13 | 0.631 | 150 |
|                              | 2  | 6.42 | 3.57 | 8.13 | 0.556 | 142 |
|                              | 3  | 6.42 | 3.08 | 8.13 | 0.479 | 134 |
|                              | 4  | 6.42 | 2.58 | 8.13 | 0.402 | 126 |
| <b>OVOC<sub>C&lt;6</sub></b> | -1 | 4.00 | 5.37 | 5.76 | 1.342 | 140 |
|                              | 0  | 4.00 | 4.91 | 5.76 | 1.228 | 132 |
|                              | 1  | 4.00 | 4.45 | 5.76 | 1.113 | 125 |
|                              | 2  | 4.00 | 3.99 | 5.76 | 0.997 | 118 |
|                              | 3  | 4.00 | 3.52 | 5.76 | 0.880 | 110 |
|                              | 4  | 4.00 | 3.05 | 5.76 | 0.762 | 103 |

## References

- Ahlberg, E., Falk, J., Eriksson, A., Holst, T., Brune, W. H., Kristensson, A., Roldin, P. and Svenningsson, B.: Secondary organic aerosol from VOC mixtures in an oxidation flow reactor, *Atmos. Environ.*, 161, 210–220, doi:10.1016/j.atmosenv.2017.05.005, 2017.
- Borrás, E. and Tortajada-Genaro, L. A.: Secondary organic aerosol formation from the photo-oxidation of benzene, *Atmos. Environ.*, 47, 154–163, doi:10.1016/j.atmosenv.2011.11.020, 2012.
- Chan, A. W. H., Kautzman, K. E., Chhabra, P. S., Surratt, J. D., Chan, M. N., Crouse, J. D., Wennberg, P. O., Flagan, R. C. and Seinfeld, J. H.: Secondary organic aerosol formation from photooxidation of naphthalene and alkylnaphthalenes: implications for oxidation of intermediate volatility organic compounds (IVOCs), *Atmos. Chem. Phys.*, 12, 2009.
- Chan, A. W. H., Chan, M. N., Surratt, J. D., Chhabra, P. S., Loza, C. L., Crouse, J. D., Yee, L. D., Flagan, R. C., Wennberg, P. O. and Seinfeld, J. H.: Role of aldehyde chemistry and NO<sub>x</sub> concentrations in secondary organic aerosol formation, *Atmos. Chem. Phys.*, 20, 2010.
- Chen, C.-L., Kacarab, M., Tang, P. and Cocker, D. R.: SOA formation from naphthalene, 1-methylnaphthalene, and 2-methylnaphthalene photooxidation, *Atmos. Environ.*, 131, 424–433, doi:10.1016/j.atmosenv.2016.02.007, 2016.
- Gómez Alvarez, E., Borrás, E., Viidanoja, J. and Hjorth, J.: Unsaturated dicarbonyl products from the OH-initiated photo-oxidation of furan, 2-methylfuran and 3-methylfuran, *Atmos. Environ.*, 43(9), 1603–1612, doi:10.1016/j.atmosenv.2008.12.019, 2009.
- Henry, F., Coeurtourneur, C., Ledoux, F., Tomas, A. and Menu, D.: Secondary organic aerosol formation from the gas phase reaction of hydroxyl radicals with m-, o- and p-cresol, *Atmos. Environ.*, 42(13), 3035–3045, doi:10.1016/j.atmosenv.2007.12.043, 2008.
- Johnson, D., Jenkin, M. E., Wirtz, K. and Martin-Reviejo, M.: Simulating the formation of secondary organic aerosol from the photooxidation of aromatic hydrocarbons, *Environmental Chemistry*, 2(1), 35, doi:10.1071/EN04079, 2005.
- Li, L., Tang, P., Nakao, S. and Cocker III, D. R.: Impact of molecular structure on secondary organic aerosol formation from aromatic hydrocarbon photooxidation under low-NO<sub>x</sub> conditions, *Atmos. Chem. Phys.*, 16(17), 10793–10808, doi:10.5194/acp-16-10793-2016, 2016.
- Nakao, S., Clark, C., Tang, P., Sato, K. and Cocker III, D.: Secondary organic aerosol formation from phenolic compounds in the absence of NO<sub>x</sub>, *Atmos. Chem. Phys.*, 11(20), 10649–10660, doi:10.5194/acp-11-10649-2011, 2011.
- Ng, N. L., Kroll, J. H., Chan, A. W. H., Chhabra, P. S., Flagan, R. C. and Seinfeld, J. H.: Secondary organic aerosol formation from m-xylene, toluene, and benzene, *Atmos. Chem. Phys.*, 7(14), 3909–3922, 2007.
- NIST Chemistry WebBook, NIST Standard Reference Database Number 69, Eds. P.J. Linstrom and W.G. Mallard, National Institute of Standards and Technology, Gaithersburg MD, 20899, <https://doi.org/10.18434/T4D303>, (retrieved November 29, 2018).
- Odum, J. R., Hoffmann, T., Bowman, F., Collins, D., Flagan, R. C. and Seinfeld, J. H.: Gas/particle partitioning and secondary organic aerosol yields, 1996.

Shakya, K. M. and Griffin, R. J.: Secondary organic aerosol from photooxidation of polycyclic aromatic hydrocarbons, *Environ. Sci. Technol.*, 44(21), 8134–8139, doi:10.1021/es1019417, 2010.

Song, C., Na, K. and Cocker, D. R.: Impact of the hydrocarbon to NO<sub>x</sub> ratio on secondary organic aerosol formation, *Environ. Sci. Technol.*, 39(9), 3143–3149, doi:10.1021/es0493244, 2005.

Takekawa, H., Minoura, H. and Yamazaki, S.: Temperature dependence of secondary organic aerosol formation by photo-oxidation of hydrocarbons, *Atmos. Environ.*, 37(24), 3413–3424, doi:10.1016/S1352-2310(03)00359-5, 2003.

Yee, L. D., Kautzman, K. E., Loza, C. L., Schilling, K. A., Coggon, M. M., Chhabra, P. S., Chan, M. N., Chan, A. W. H., Hersey, S. P., Crouse, J. D., Wennberg, P. O., Flagan, R. C. and Seinfeld, J. H.: Secondary organic aerosol formation from biomass burning intermediates: phenol and methoxyphenols, *Atmos. Chem. Phys.*, 13(16), 8019–8043, doi:10.5194/acp-13-8019-2013, 2013.
